# Supplementary material for: Diagnostic accuracy of Onen’s Alternative Grading System combined with Doppler evaluation of ureteral jets as an alternative in the diagnosis of obstructive hydronephrosis in children
Source: PeerJ. 2018 May 18;6:e4791. doi: 10.7717/peerj.4791 (PMC5961622; doi:10.7717/peerj.4791)
Supplement: Supplemental Information 1 [file peerj-06-4791-s001.xls]

## Sheet: Plan1
Gender	Size 1left/2right	age	DRF controls	DRF HN	SFU	Onem	T1/2	SHAPE	Jets control	Jets hydron	Jets control + Hydronep	Relative Jet fequency	Ratio hydro/controls
2	1	2	46.35	53.65	3	2	NO	3	16	15	31	0.483871	0.9375
2	1	2.2	51.9	48.9	3	2	NO	3	11	10	21	0.47619	0.909091
2	1	2.3	46	54	3	2	NO	3	18	17	35	0.485714	0.944444
2	1	2.33	45.3	54.7	3	2	NO	3	13	8	21	0.380952	0.615385
2	1	3	59.8	40.2	3	2	NO	3	11	8	19	0.421053	0.727273
2	1	3.2	51.4	48.6	3	2	NO	2	11	12	23	0.521739	1.09091
2	2	3.33	63	43	3	2	O	4	13	2	15	0.133333	0.153846
1	1	3.7	62	41	3	2	O	4	14	0	14	0	0
2	2	3.8	58	42	3	2	NO	3	19	17	36	0.472222	0.894737
2	2	4	48.1	51.9	3	2	NO	3	19	16	35	0.457143	0.842105
2	2	5	54	46	3	2	NO	2	16	6	22	0.272727	0.375
2	1	5.3	49	51	3	2	NO	3	8	3	11	0.272727	0.375
2	1	5.9	52.7	42.3	3	2	O	4	21	8	29	0.275862	0.380952
2	1	7	49.2	50.8	3	2	NO	3	16	13	29	0.448276	0.8125
1	2	9	54	46	3	2	NO	2	21	22	43	0.511628	1.04762
2	1	9	49	51	3	2	NO	2	11	13	24	0.541667	1.18182
2	1	10	52	48	3	2	NO	2	23	19	42	0.452381	0.826087
2	1	12	50.7	49.3	3	2	NO	2	19	17	36	0.472222	0.894737
1	1	12	49.9	50.1	3	2	NO	2	11	8	19	0.421053	0.727273
2	1	17	51	49	3	2	NO	4	7	7	14	0.5	1
1	1	2.2	71.2	28.8	4	3	O	4	12	0	12	0	0
2	2	2.33	74.7	26.31	4	3	O	4	20	1	21	0.047619	0.05
1	1	2.8	83	17	3	3	O	4	13	0	13	0	0
2	2	2.9	77	23	4	3	O	4	18	0	18	0	0
2	1	3.8	60.4	39.6	4	3	O	4	18	4	22	0.181818	0.222222
2	1	3.9	45	55	4	3	NO	4	18	14	32	0.4375	0.777778
1	2	4.3	66.2	33.8	4	3	O	4	14	0	14	0	0
2	1	4.5	56	44	4	3	NO	4	9	4	13	0.307692	0.444444
1	2	5	54	46	4	3	NO	4	23	18	41	0.439024	0.782609
2	1	5.5	44	56	4	3	NO	3	24	0	24	0	0
2	1	6.3	49	51	4	3	NO	3	14	13	27	0.481481	0.928571
1	2	9	71	28.6	3	3	O	4	16	0	16	0	0
2	1	10	66.8	33.2	4	3	O	4	19	0	19	0	0
2	2	11.9	41	59	4	3	O	3	13	10	23	0.434783	0.769231
2	1	12	64	36	4	3	O	4	15	0	15	0	0
2	1	12.9	95	5	3	3	O	5	7	0	7	0	0
1	1	13.3	66	34	4	3	O	4	34	10	44	0.227273	0.294118
2	1	16	53.8	46.2	3	3	NO	3	20	18	38	0.473684	3
2	2	2.1	97	3	4	4	O	5	12	0	12	0	0
1	2	2.3	100	0	4	4	O	5	17	0	17	0	0
2	1	3	95.7	4.3	4	4	O	5	19	2	21	0.0952381	0.105263
2	1	3	73	28	4	4	O	4	6	0	6	0	0
1	2	4	88	12	4	4	O	4	12	0	12	0	0
2	1	16	75	25	4	4	O	4	18	0	18	0	0
				HN= Hydronephrosis

## Sheet: Plan2
Nome	GENERO	Lado 1E/2D	Idade	CONTROLE	HN	SFU	Onem	T1/2	SHAPE	JC	JHN	SOMA	rjf	Razao
